# Supplementary material for: Selenium-Containing (Hetero)Aryl Hybrids as Potential Antileishmanial Drug Candidates: In Vitro Screening against L. amazonensis
Source: MDPI journal article supplement (doi:10.3390/biomedicines12010213), 2024-01-17
Supplement: s1 [file s1]

**TABLE S1. Cytotoxicity and selectivity index (SI) of selenium-compounds against different host cell lines and promastigote forms of *Leishmania amazonensis*.**

| Compound | IC50<br><i>L. amazonensis</i><br>( $\mu$ M) | CC50 NIH/3T3<br>( $\mu$ M) | Selectivity<br>Index (SI) | CC50 J774<br>( $\mu$ M) | Selectivity<br>Index (SI) | CC50 peritoneal<br>cells ( $\mu$ M) | Selectivity<br>Index (SI) |
|----------|---------------------------------------------|----------------------------|---------------------------|-------------------------|---------------------------|-------------------------------------|---------------------------|
| 101      | 30.46 $\pm$ 1.17                            | > 200                      | 6.57                      | > 200                   | 6.57                      | > 200                               | 6.57                      |
| 102      | 15.15 $\pm$ 1.12                            | > 200                      | 13.20                     | > 200                   | 13.20                     | > 200                               | 13.20                     |
| 103      | 15.48 $\pm$ 1.13                            | > 200                      | 12.92                     | > 200                   | 12.92                     | > 200                               | 12.92                     |
| 104      | 16.17 $\pm$ 1.19                            | > 200                      | 12.37                     | 126.7 $\pm$ 1.04        | 7.84                      | > 200                               | 12.37                     |
| 105      | 12.17 $\pm$ 1.12                            | 87.85 $\pm$ 1.09           | 7.22                      | 60.16 $\pm$ 1.04        | 4.94                      | > 200                               | 16.43                     |
| 106      | 3.96 $\pm$ 1.09                             | > 200                      | 50.53                     | > 200                   | 50.53                     | > 200                               | 50.53                     |
| 107      | 27.37 $\pm$ 1.24                            | > 200                      | 7.31                      | > 200                   | 7.31                      | > 200                               | 7.31                      |
| 108      | 4.23 $\pm$ 2.00                             | > 200                      | 47.31                     | > 200                   | 47.31                     | > 200                               | 47.31                     |
| 111      | 17.55 $\pm$ 1.18                            | > 200                      | 11.40                     | > 200                   | 11.40                     | > 200                               | 11.40                     |
| 113      | 40.98 $\pm$ 1.31                            | > 200                      | 4.88                      | > 200                   | 4.88                      | > 200                               | 4.88                      |
| ANFB     | 9.407 $\pm$ 1.13                            | 19.26 $\pm$ 1.01           | 2.05                      | 27.34 $\pm$ 0.92        | 2.91                      | 25.15 $\pm$ 0.82                    | 2.67                      |

The antileishmanial activity of selenium-compounds was evaluated against promastigote forms of *L. amazonensis* after 48 hours. The cytotoxicity was performed in NIH/3T3 cells, J774A.1 cells and peritoneal macrophages. Selectivity index (SI) was calculated as CC50/IC50 values for Abbreviations: CC50 = half-maximal cytotoxic concentration; IC50 = half-maximal inhibitory concentration; SD = standard deviation; SI = selectivity index. ANFB = amphotericin B used as reference drug for *L. amazonensis*.

**TABLE S2. Cytotoxicity and selectivity index (SI) of selenium-compounds against different host cell lines and intracellular amastigotes forms of *Leishmania amazonensis*.**

| Compound | IC50<br><i>L. amazonensis</i><br>( $\mu$ M) | CC50 NIH/3T3<br>( $\mu$ M) | Selectivity<br>Index (SI) | CC50 J774<br>( $\mu$ M) | Selectivity<br>Index (SI) | CC50 peritoneal<br>cells ( $\mu$ M) | Selectivity<br>Index (SI) |
|----------|---------------------------------------------|----------------------------|---------------------------|-------------------------|---------------------------|-------------------------------------|---------------------------|
| 101      | > 50                                        | > 200                      | ind                       | > 200                   | ind                       | > 200                               | ind                       |
| 102      | > 50                                        | > 200                      | ind                       | > 200                   | ind                       | > 200                               | ind                       |
| 103      | > 50                                        | > 200                      | ind                       | > 200                   | ind                       | > 200                               | ind                       |
| 104      | > 50                                        | > 200                      | ind                       | 126.7 $\pm$ 1.04        | ind                       | > 200                               | ind                       |
| 105      | > 50                                        | 87.85 $\pm$ 1.09           | ind                       | 60.16 $\pm$ 1.04        | ind                       | > 200                               | ind                       |
| 106      | > 50                                        | > 200                      | ind                       | > 200                   | ind                       | > 200                               | ind                       |
| 107      | 18.31 $\pm$ 1.50                            | > 200                      | 10.92                     | > 200                   | 10.92                     | > 200                               | 10.92                     |
| 108      | > 50                                        | > 200                      | ind                       | > 200                   | ind                       | > 200                               | ind                       |
| 111      | > 50                                        | > 200                      | ind                       | > 200                   | ind                       | > 200                               | ind                       |
| 113      | 15.93 $\pm$ 1.69                            | > 200                      | 12.55                     | > 200                   | 12.55                     | > 200                               | 12.55                     |
| ANFB     | 0.97 $\pm$ 1.14                             | 19.26 $\pm$ 1.01           | 25.92                     | 27.34 $\pm$ 0.92        | 28.19                     | 25.15 $\pm$ 0.82                    | 25.93                     |

The antileishmanial activity of selenium-compounds was evaluated against intracellular amastigotes forms of *L. amazonensis* after 24 hours. The cytotoxicity was performed in NIH/3T3 cells, J774A.1 cells and peritoneal macrophages. Selectivity index (SI) was calculated as CC50/IC50 values for Abbreviations: CC50 = half-maximal cytotoxic concentration; IC50 = half-maximal inhibitory concentration; SD = standard deviation; SI = selectivity index. ANFB = amphotericin B used as reference drug for *L. amazonensis*. Ind = means indetermined results.
